# Supplementary material
Source: MDPI journal article supplement (https://www.mdpi.com/2038-8330/14/3/35)
Supplement: s1 [file s1]

| Table S2. Major                                                                                                                                                                                                                                                                                                                                                                                                                                                                        |                  |    |         |                |
|----------------------------------------------------------------------------------------------------------------------------------------------------------------------------------------------------------------------------------------------------------------------------------------------------------------------------------------------------------------------------------------------------------------------------------------------------------------------------------------|------------------|----|---------|----------------|
| <b>P. The Joanna Briggs Institute (JBI) Critical Appraisal Checklist for Case Reports (last amended in 2017)</b><br><b>Website:</b> <a href="https://joannabriggs.org/critical_appraisal_tools">https://joannabriggs.org/critical_appraisal_tools</a><br><a href="https://wiki.joannabriggs.org/display/MANUAL/Appendix+7.4+Critical+appraisal+checklist+for+case+reports">https://wiki.joannabriggs.org/display/MANUAL/Appendix+7.4+Critical+appraisal+checklist+for+case+reports</a> |                  |    |         |                |
| Major Components                                                                                                                                                                                                                                                                                                                                                                                                                                                                       | Response options |    |         |                |
| 1. Were patient's demographic characteristics clearly described?                                                                                                                                                                                                                                                                                                                                                                                                                       | Yes              | No | Unclear | Not applicable |
| 2. Was the patient's history clearly described and presented as a timeline?                                                                                                                                                                                                                                                                                                                                                                                                            | Yes              | No | Unclear | Not applicable |
| 3. Was the current clinical condition of the patient on presentation clearly described?                                                                                                                                                                                                                                                                                                                                                                                                | Yes              | No | Unclear | Not applicable |
| 4. Were diagnostic tests or assessment methods and the results clearly described?                                                                                                                                                                                                                                                                                                                                                                                                      | Yes              | No | Unclear | Not applicable |
| 5. Was the intervention(s) or treatment procedure(s) clearly described?                                                                                                                                                                                                                                                                                                                                                                                                                | Yes              | No | Unclear | Not applicable |
| 6. Was the post-intervention clinical condition clearly described?                                                                                                                                                                                                                                                                                                                                                                                                                     | Yes              | No | Unclear | Not applicable |
| 7. Were adverse events (harms) or unanticipated events identified and described?                                                                                                                                                                                                                                                                                                                                                                                                       | Yes              | No | Unclear | Not applicable |
| 8. Does the case report provide takeaway lessons?                                                                                                                                                                                                                                                                                                                                                                                                                                      | Yes              | No | Unclear | Not applicable |
| Overall appraisal:   Include <input type="checkbox"/> Exclude <input type="checkbox"/> Seek further info <input type="checkbox"/>                                                                                                                                                                                                                                                                                                                                                      |                  |    |         |                |
|                                                                                                                                                                                                                                                                                                                                                                                                                                                                                        |                  |    |         |                |
| 10. Were uninterpretable/ intermediate test results reported? (uninterpretable results reported)                                                                                                                                                                                                                                                                                                                                                                                       | Yes              | No | Unclear |                |
| 11. Were withdrawals from the study explained? (withdrawals explained)                                                                                                                                                                                                                                                                                                                                                                                                                 | Yes              | No | Unclear |                |
